# Supplementary material
Source: publisher figshare collection journal article supplement (https://frontiersin.figshare.com/ndownloader/files/14476403)
Supplement: Supplementary file 1 [file 14476403]

Supplemental materials

**Efficacy Scale items**

To what extent do you agree or disagree with the following statements?

***Collective efficacy -- optimism***

1. People are capable of working together to solve big social problems
2. We live in a cooperative society where people are willing to work hard to address important societal issues

***Collective efficacy -- pessimism***

1. People are too selfish to cooperate and to fix big problems
2. It is impossible to get large groups of people to work together on anything

Note: Because of low reliability on our collective efficacy measure when we used all four items together (Cronbach α = .49), we conducted exploratory factor analyses with pro-max rotation (a non-orthogonal rotation, which allows correlation between factors) to determine if there were subscales. These analyses suggested that this set of items is better represented by the two separate factors: optimism and pessimism, as noted above.

***Collective response efficacy***

1. Climate change is beyond human control (recode)
2. Humans have the ability to reduce climate change
3. The federal government has the ability to reduce climate change
4. Humans have the ability to eliminate the threat of climate change.

***Personal efficacy***

1. I am capable of contacting government officials to share my views about climate change with them.
2. I am capable of engaging in a conversation with family and friends about climate change
3. I am capable of giving time or money to organizations and events promoting action on climate change

***Personal response efficacy***

1. When average people share their views on climate change with government officials, it can influence officials' actions on climate change
2. When average people talk about climate change with family and friends, it can lead to action on climate change
3. When average people give time and/or money to organizations and events promoting climate change, it can promote action on climate change.

**Group Norms**

How many people among the [GENERAL PUBLIC in the UNITED STATES/PEOP

LE IN YOUR COMMUNITY] would you estimate did each of the following at least once over the last 6 months?

1. Participated politically to address climate change (e.g., vote, contact officials, sign petitions)
2. Engaged in environmental activism on issues related to climate change
3. Talk to friends or family members about the importance of addressing climate change
4. Twittered or posted updates and/or links to social networking webpages (e.g., Facebook) to help their social contacts learn more about climate change.

**Meta-Perceptions**

As far as you know, what proportion of people within each of the following groups would be considered to be VERY CONCERNED about climate change?

Remember, we described VERY CONCERNED individuals as those who are very concerned about climate change and think the government and individuals

need to act now.

*The following groups were listed:*

Climate scientists, The U.S. public, People in my community, People I know personally (friends, Family, coworkers, acquaintances, neighbors), Women, Men, Younger adults (e.g., under 30); Older adults (e.g., over 55), Republicans, Democrats

**Collective Action Intentions**

Please indicate whether you anticipate doing in the following behaviors this summer. DO NOT INCLUDE any plans to attend either of the rallies mentioned above in your answer.

1. Learn more about climate change
2. Start or increase my commitment to particular groups working to address climate change
3. Participate politically to address climate change (vote for candidates that will address climate change, contact government officials, sign petitions, participated in a protest).
4. Engaged in environmental activism on issues related to climate change
5. Talk to friends or family members about the importance of addressing climate change.
6. Twitter or post updates and/or links to social networking webpages (e.g., Facebook) to help my social contacts learn more about climate change.

**Coding of Political Leaning of preferred media sources.**

*Coding of news sources.*

Otero (2018), the creator of the Media Bias chart, read at least ten articles for each source and rated them on several criteria to create ratings of the news sources quality and partisan bias. For her “political bias”, the values we used in the present study, the articles were rated as to the political ideology conveyed in the headline and counting of positions taken in each sentence of each article (counting the political position, characterization, and terminology used).

A list of the news sources and codes used are noted below. A list of these news sources that were not included in the Media Bias are also listed below. In addition to these sources, some did not report specific media sources but instead reported, general news sources (e.g., tv, friends, family; *n*= 29). As described in the text, we devised an imputation method to assign values to those who provided sources not listed in media bias or general sources.

News sources codes derived from Media bias correlated with participants’ political ideology, *r*(435) = .52, *p* < .001, and participants’ subjective ratings of the political leanings of their general news and climate change news sources, *r*(439) = .53, *p* < .001. Data from Budak, Goel, Rao (2016) also validate the Media Bias ratings. Budak et al., (2016) used crowdsourcing to identify the political leanings of 803,146 articles published in these the fifteen news sources. Thirteen of these sources were noted in by our participants. The Media Bias codes were strongly correlated with the codes provided by (Budak et al., 2016), *r*(13) = .84.

Most participants provided more than one news sources (see figure). We averaged ratings within general news sources and within the climate change news sources and then averaged these two numbers to create a single news rating score for each participant. The final political leaning scores (i.e., the ratings derived from Media Bias and the ratings from imputation) were correlated with participants’ political ideology, *r*(578) = .56, *p* < .001, and participants’ subjective ratings of the political leanings of their general news and climate change news sources, *r*(582) = .57, *p* < .001. On average, the objective ratings indicated that the news sources were more conservative than what participants perceived them to be. Specifically, converting the objective and subjective average ratings to both be on a -3 to +3 scale, we found that the average objective ratings indicated participants’ news sources were rated neutral (*M* = .07, *SD* = .84) and more conservative then participants rated them to be (*M* = -.67, *SD* = 1.23).

| **News Sources coded**  **from Media Bias** | **Rating Derived from Media Bias (-liberal; + conservative)** | |
| --- | --- | --- |
| Patribiotics | -8 | |
| Palmer Report | -7.5 | |
| Occupy Democrats | -7 | |
| New Republic | -7 | |
| Bipartisan Report | -6.5 | |
| David Wolfe | -6.5 | |
| Forward Progressives | -6 | |
| Daily Kos | -6 | |
| Alternet | -5.5 | |
| Second Nexus | -5.5 | |
| Huffington Post | -5 | |
| Mother Jones | -5 | |
| Daily Beast | -5 | |
| Slate | -5 | |
| The Intercept | -5 | |
| Democracy Now | -5 | |
| Buzz Feed News | -4.5 | |
| MSNBC | -4.5 | |
| Mic | -4.5 | |
| Jacobin | -4.5 | |
| Vox | -4 | |
| The Atlantic | -4 | |
| Nation | -4 | |
| Realfaraway.com | -4 | |
| Vanity Fair | -3 | |
| The New Yorker | -3 | |
| The Week | -2.5 | |
| Politico | -2.5 | |
| Axios | -2 | |
| Local newspaper-- liberal city | -2 | |
| The Guardian | -1.5 | |
| The Washington Post | -1.5 | |
| The New York Times | -1.5 | |
| CNN | -1.5 | |
| NBC News | -1 | |
| NPR | -1 | |
| BBC | -1 | |
| AP | -0.5 | |
| AFP | -0.5 | |
| USA Today | 0 | |
| ABC News | 0 | |
| CBS News | 0.5 | |
| Time | 1 | |
| The Economist | 1 | |
| Reuters | 1 | |
| Bloomberg | 1 | |
| PBS | 1 | |
| Christian Science Monitor | 1 | |
| National Enquirer | 1 | |
| FP (Foriegn | 1.5 | |
| Natural News | 1.5 | |
| The Wall Street Journal | 2 | |
| Local newspaper—conservative city | | 2 |
| Daily Mail | 2.5 | |
| The Hill | 3 | |
| The Fiscal Times | 3.5 | |
| World Truth.tv | 3.5 | |
| National Review | 4.5 | |
| The Weekly Standard | 4.5 | |
| Reason.com | 4.5 | |
| Examiner | 4.5 | |
| New York Post | 4.5 | |
| The Washington Times | 5 | |
| The Daily Caller | 5.5 | |
| Newsmax | 6 | |
| Redstate | 6 | |
| The Blaze | 6 | |
| The American Conservative | 6.5 | |
| The Federalist | 6.5 | |
| Oan | 6.5 | |
| Drudge Report | 6.5 | |
| Fox News | 6.5 | |
| Daily Wire | 7 | |
| Conservative Tribune | 7.5 | |
| Breitbart | 7.5 | |
| Infowars | 8.5 | |

| **Sources not found on Media Bias**  4Chan |
| --- |
| 8Chan |
| Al Jazeera |
| Alexa |
| Altepa |
| Amazon |
| Amtv |
| Anderson 360 |
| Animal Planet |
| AOL |
| AOL News |
| Apple News |
| Ars Technica |
| Audubon Society |
| Avaaz |
| Bad Astronomy |
| Beat The Press |
| Ben Shapiro |
| Bernie Sanders |
| Big Think |
| Bill Maher |
| Bill Nye |
| Bing News |
| Blacklisted News |
| Blastr |
| Boston Globe |
| Breakthrough |
| Breibart |
| Business Courier |
| Business Insider |
| Change |
| Charlie Rose |
| Chris Hayes |
| Cleveland |
| Climate Change News |
| Climate Wire |
| Complex Everyday Struggle |
| CSpan |
| Daily Intelligencer |
| Daily Stormer |
| Dan Rather |
| Dateline |
| David Pakman |
| David Seaman |
| Deadspin |
| Deseret News |
| Digg |
| Discord |
| Discovery News |
| E And E |
| Economists View |
| Encyclopedia Of Atmospheric Environment |
| EPA |
| ESPN |
| Facebook |
| Financial Times |
| Fivethirtyeight |
| Flipboard |
| Flipbook |
| For News |
| Forbes |
| Free Press |
| Futurism |
| GN |
| Good Morning America |
| Google News |
| Greenpeace |
| Hbo |
| Henry Makow |
| High Impact Felix |
| Hln |
| Hot Air |
| I Fucking Love Science |
| Instagram |
| Instapundit |
| Io9 |
| Irish Examiner |
| Jason A |
| Jezebel |
| John Oliver |
| Keith Olbermann |
| Kid Kraddick |
| Kinja |
| Ksl |
| Kyle Kulinski |
| Lapatilla |
| Lew Rockwell |
| Livelea |
| Louder With Crowder |
| Mail |
| Market Watch |
| Marketplace |
| Meet The Press |
| Memeorandum |
| Meta Filter |
| Metafilter |
| Metanoia |
| Michaela |
| Move On |
| Msn |
| Mturk |
| Naked Capitalism |
| Nancy Grace |
| Narrative Collapse |
| Nasa |
| National Geographic |
| Natural Mom |
| Nature |
| Neil Degrasse Tyson |
| Neogaf |
| Netflix |
| News Lounge |
| News Map |
| News Target |
| Newsmap |
| Newsmax |
| Newspress Now |
| Nova |
| Occidental Dissent |
| One American Network |
| Patheos |
| Pew Center |
| Phys Org |
| Plunderbund |
| Pod Save America |
| Pod Save The World |
| Police Scanner |
| Politics Usa |
| Popsugar |
| Popular Science |
| Prison Planet |
| Rachel Maddow |
| Real Clear Politics |
| Red Eye Podcast |
| Red Eye Radio |
| Reddit |
| Roll Call |
| Rt |
| Rush Limbaugh |
| Salon |
| Samantha Bee |
| Sci Tech Now |
| Science |
| Science Daily |
| Science Today |
| Scientific American |
| Secular Talk |
| Seth Meyers |
| Smithsonian |
| Snapchat |
| Spidr |
| Steve Sailer |
| Tech Crunch |
| Tech Insider |
| The Advise Show |
| The Blaze |
| The Chesapeake Bay Foundation |
| The Daily Show |
| The Environmental Defense Fund |
| The Environmental Protection Agency |
| The Five |
| The Intercept |
| The Late Show |
| The Liberal Ie |
| The Los Angeles Times |
| The Macarthur Foundation |
| The National Science Foundation |
| The Nature Channel |
| The Nature Conservancy |
| The Nature Journal |
| The Observer |
| The Ocean Conservancy |
| The Right Stuff |
| The Sam Sedar Show |
| The Science Channel |
| The Science Journal |
| The Scientist |
| The Sierra Club |
| The Today Show |
| The View |
| The Watchers |
| The Weather Channel |
| The Week |
| The Young Turks |
| Think Progress |
| Tmz |
| Truthout |
| Tumblr |
| Twitter |
| Universe Today |
| Unknown Country |
| Vice |
| Vpr |
| Walton And Johnson |
| Wattsupwiththat |
| Wendy Williams |
| Whatsapp |
| Wikipedia |
| Wired |
| Wnd |
| World |
| Wwf |
| Xfinity News |
| Yahoo News |
| Youtube |
| Zero Hedge |

| Table 1.1.1. Collective Efficacy-Optimism Regressed onto Time of Survey and News Leaning with Covariates | | | | | | | |  |
| --- | --- | --- | --- | --- | --- | --- | --- | --- |
|  | predictor |  | Base Model (95% CI) |  | Main Effects (95% CI) |  | Interactions (95% CI) |  |
|  | (Intercept) |  | 0.96*** |  | 0.97*** |  | 0.97*** |  |
|  |  |  | (0.86, 1.07) |  | (0.86, 1.07) |  | (0.86, 1.07) |  |
|  | SES |  | 0.06* |  | 0.06* |  | 0.06* |  |
|  |  |  | (0.01, 0.11) |  | (0.01, 0.12) |  | (0.01, 0.12) |  |
|  | Gender |  | -0.09* |  | -0.11* |  | -0.11* |  |
|  |  |  | (-0.18, < - .01) |  | (-0.20, -0.02) |  | (-0.20, -0.02) |  |
|  | Age |  | -0.01 |  | -0.01 |  | -0.01 |  |
|  |  |  | (-0.01, < . 01) |  | (-0.01, < . 01) |  | (-0.01, < . 01) |  |
|  | White |  | -0.08 |  | -0.08 |  | -0.08 |  |
|  |  |  | (-0.18, 0.03) |  | (-0.18, 0.03) |  | (-0.18, 0.02) |  |
|  | Climate change concern |  | 0.20*** |  | -0.21*** |  | -0.21*** |  |
|  |  |  | (-0.28, -0.13) |  | (-0.29, -0.13) |  | (-0.29, -0.14) |  |
|  | Political ideology |  | -0.03 |  | -0.02 |  | -0.02 |  |
|  |  |  | (-0.13, 0.06) |  | (-0.13, 0.08) |  | (-0.13, 0.08) |  |
|  | Time of Survey |  |  |  | 0.12* |  | 0.12** |  |
|  |  |  |  |  | (0.03, 0.21) |  | (0.03, 0.21) |  |
|  | News leaning |  |  |  | < - .01 |  | < - .01 |  |
|  |  |  |  |  | (-0.05, 0.04) |  | (-0.05, 0.04) |  |
|  | News leaning X Time |  |  |  |  |  | 0.02 |  |
|  |  |  |  |  |  |  | (-0.01, 0.06) |  |
|  |  |  |  |  |  |  |  |  |
|  | Observations |  | 566 |  | 566 |  | 566 |  |
|  | *F* (df) |  | 10.64 (df = 6, 559)*** |  | 8.90 (df = 8, 557)*** |  | 8.09 (df = 9, 556)*** |  |
|  | Overall *R*2 |  | .10 |  | .11 |  | .12 |  |
|  | Change in *R*2 |  |  |  | .01* |  | < .01 |  |

**p* < .05, ***p* < .01, *** *p* < .001

| Table 1.1.2. Collective Efficacy-Optimism Regressed onto Heard vs. Not Heard and News Leaning with Covariates | | | | | | | |  |
| --- | --- | --- | --- | --- | --- | --- | --- | --- |
|  | predictor |  | Base Model (95% CI) |  | Main Effects (95% CI) |  | Interactions (95% CI) |  |
|  | (Intercept) |  | -0.31** |  | -0.32** |  | -0.29** |  |
|  |  |  | (-0.51, -0.11) |  | (-0.52, -0.12) |  | (-0.49, -0.09) |  |
|  | SES |  | < -.01 |  | -0.01 |  | -0.01 |  |
|  |  |  | (-0.1, 0.1) |  | (-0.11, 0.1) |  | (-0.11, 0.09) |  |
|  | Gender |  | 0.05 |  | 0.04 |  | 0.03 |  |
|  |  |  | (-0.12, 0.22) |  | (-0.13, 0.21) |  | (-0.15, 0.2) |  |
|  | Age |  | < .01 |  | <. 01 |  | < .01 |  |
|  |  |  | (-0.02, 0.01) |  | (-0.02, 0.01) |  | (-0.02, 0.01) |  |
|  | White |  | -0.18 |  | -0.18 |  | -0.17 |  |
|  |  |  | (-0.38, 0.02) |  | (-0.38, 0.02) |  | (-0.37, 0.03) |  |
|  | Climate change concern |  | 0.22** |  | 0.24** |  | 0.25** |  |
|  |  |  | (0.08, 0.36) |  | (0.10, 0.38) |  | (0.10, 0.39) |  |
|  | Political ideology |  | -0.03 |  | 0.02 |  | 0 |  |
|  |  |  | (-0.22, 0.15) |  | (-0.19, 0.23) |  | (-0.2, 0.21) |  |
|  | Heard vs. Not Heard |  |  |  | 0.11 |  | 0.10 |  |
|  |  |  |  |  | (-0.07, 0.29) |  | (-0.07, 0.28) |  |
|  | News leaning |  |  |  | -0.04 |  | -0.03 |  |
|  |  |  |  |  | (-0.12, 0.05) |  | (-0.12, 0.05) |  |
|  | News leaning X Heard |  |  |  |  |  | 0.06 |  |
|  |  |  |  |  |  |  | (< .01 , 0.13) |  |
|  |  |  |  |  |  |  |  |  |
|  | Observations |  | 279 |  | 279 |  | 279 |  |
|  | *F* (df) |  | 2.58 (df = 6, 272)* |  | 2.24 (df = 8, 270)* |  | 2.37 (df = 9, 269)* |  |
|  | Overall *R*2 |  | .05 |  | .06 |  | .07 |  |
|  | Change in *R*2 |  |  |  | .01 |  | .01 |  |

**p* < .05; ***p* < .01, *** *p* < .001

| Table 1.2.1. Collective Efficacy-Pessimism Regressed onto Time of Survey and News Leaning with Covariates | | | | | | | |  |
| --- | --- | --- | --- | --- | --- | --- | --- | --- |
|  | predictor |  | Base Model (95% CI) |  | Main Effects (95% CI) |  | Interactions (95% CI) |  |
|  | (Intercept) |  | -0.14* |  | -0.14* |  | -0.14* |  |
|  |  |  | (-0.28, < -.01) |  | (-0.28, < -.01) |  | (-0.28, -0.01) |  |
|  | SES |  | 0.02 |  | 0.01 |  | 0.01 |  |
|  |  |  | (-0.05, 0.09) |  | (-0.06, 0.08) |  | (-0.06, 0.08) |  |
|  | Gender |  | 0.01 |  | 0.04 |  | 0.04 |  |
|  |  |  | (-0.11, 0.13) |  | (-0.08, 0.16) |  | (-0.08, 0.16) |  |
|  | Age |  | 0.01 |  | 0.01 |  | <. 01 |  |
|  |  |  | (0, 0.02) |  | (0, 0.02) |  | (0, 0.02) |  |
|  | White |  | -0.09 |  | -0.09 |  | -0.08 |  |
|  |  |  | (-0.23, 0.05) |  | (-0.23, 0.05) |  | (-0.22, 0.06) |  |
|  | Climate change concern |  | 0.11* |  | 0.11* |  | 0.12* |  |
|  |  |  | (0.01, 0.21) |  | (0.01, 0.21) |  | (0.02, 0.22) |  |
|  | Political ideology |  | 0.10 |  | 0.06 |  | 0.06 |  |
|  |  |  | (-0.03, 0.23) |  | (-0.08, 0.20) |  | (-0.07, 0.20) |  |
|  | Time of Survey |  |  |  | -0.2** |  | -0.2** |  |
|  |  |  |  |  | (-0.32, -0.08) |  | (-0.32, -0.08) |  |
|  | News leaning |  |  |  | 0.03 |  | 0.03 |  |
|  |  |  |  |  | (-0.03, 0.09) |  | (-0.03, 0.08) |  |
|  | News leaning X Time |  |  |  |  |  | -0.06* |  |
|  |  |  |  |  |  |  | (-0.1, -0.01) |  |
|  |  |  |  |  |  |  |  |  |
|  | Observations |  | 566 |  | 566 |  | 566 |  |
|  | *F* (df) |  | 2.98 (df = 6, 559)** |  | 3.7 (df = 8, 557)*** |  | 3.89 (df = 9, 556)*** |  |
|  | Overall *R*2 |  | .03 |  | .05 |  | .06 |  |
|  | Change in *R*2 |  |  |  | .02** |  | .01* |  |

**p* < .05, ***p* < .01, *** *p* < .001

| Table 1.2.2. Collective Efficacy-Pessimism Regressed onto Heard vs. Not Heard and News Leaning with Covariates | | | | | | | | |
| --- | --- | --- | --- | --- | --- | --- | --- | --- |
|  | predictor |  | Base Model (95% CI) |  | Main Effects (95% CI) |  | Interactions (95% CI) |  |
|  | (Intercept) |  | -0.31** |  | -0.32** |  | -0.29** |  |
|  |  |  | (-0.51, -0.11) |  | (-0.52, -0.12) |  | (-0.49, -0.09) |  |
|  | SES |  | < -.01 |  | -0.01 |  | -0.01 |  |
|  |  |  | (-0.1, 0.1) |  | (-0.11, 0.1) |  | (-0.11, 0.09) |  |
|  | Gender |  | 0.05 |  | 0.04 |  | 0.03 |  |
|  |  |  | (-0.12, 0.22) |  | (-0.13, 0.21) |  | (-0.15, 0.2) |  |
|  | Age |  | < .01 |  | <. 01 |  | < .01 |  |
|  |  |  | (-0.02, 0.01) |  | (-0.02, 0.01) |  | (-0.02, 0.01) |  |
|  | White |  | -0.18 |  | -0.18 |  | -0.17 |  |
|  |  |  | (-0.38, 0.02) |  | (-0.38, 0.02) |  | (-0.37, 0.03) |  |
|  | Climate change concern |  | 0.22** |  | 0.24** |  | 0.25** |  |
|  |  |  | (0.08, 0.36) |  | (0.10, 0.38) |  | (0.10, 0.39) |  |
|  | Political ideology |  | -0.03 |  | 0.02 |  | <0.01 |  |
|  |  |  | (-0.22, 0.15) |  | (-0.19, 0.23) |  | (-0.2, 0.21) |  |
|  | Heard vs. Not Heard |  |  |  | 0.11 |  | 0.10 |  |
|  |  |  |  |  | (-0.07, 0.29) |  | (-0.07, 0.28) |  |
|  | News leaning |  |  |  | -0.04 |  | -0.03 |  |
|  |  |  |  |  | (-0.12, 0.05) |  | (-0.12, 0.05) |  |
|  | News leaning X Heard |  |  |  |  |  | 0.06 |  |
|  |  |  |  |  |  |  | (0, 0.13) |  |
|  |  |  |  |  |  |  |  |  |
|  | Observations |  | 279 |  | 279 |  | 279 |  |
|  | *F* (df) |  | 2.58 (df = 6, 272)* |  | 2.24 (df = 8, 270)* |  | 2.37 (df = 9, 269)* |  |
|  | Overall *R*2 |  | .05 |  | .06 |  | .07 |  |
|  | Change in *R*2 |  |  |  | .01 |  | .01 |  |

**p* < .05, ***p* < .01, *** *p* < .001

| Table 1.3.1. Collective Response Efficacy Regressed onto Time of Survey and News Leaning with Covariates | | | | | | | |  |
| --- | --- | --- | --- | --- | --- | --- | --- | --- |
|  | predictor |  | Base Model (95% CI) |  | Main Effects (95% CI) |  | Interactions (95% CI) |  |
|  | (Intercept) |  | 1.17*** |  | 1.16*** |  | 1.16*** |  |
|  |  |  | (1.07, 1.26) |  | (1.07, 1.26) |  | (1.07, 1.26) |  |
|  | SES |  | 0.03 |  | 0.03 |  | 0.03 |  |
|  |  |  | (-0.01, 0.08) |  | (-0.02, 0.08) |  | (-0.02, 0.08) |  |
|  | Gender |  | -0.01 |  | -0.01 |  | -0.01 |  |
|  |  |  | (-0.09, 0.07) |  | (-0.09, 0.07) |  | (-0.09, 0.07) |  |
|  | Age |  | < - .01 |  | < - .01 |  | < - .01 |  |
|  |  |  | (-0.01, < .01) |  | (-0.01, < .01) |  | (-0.01, < .01) |  |
|  | White |  | -0.13** |  | -0.13** |  | -0.13** |  |
|  |  |  | (-0.23, -0.04) |  | (-0.22, -0.03) |  | (-0.22, -0.03) |  |
|  | Climate change concern |  | -0.63*** |  | -0.63*** |  | -0.63*** |  |
|  |  |  | (-0.70, -0.56) |  | (-0.70, -0.56) |  | (-0.70, -0.55) |  |
|  | Political ideology |  | -0.23*** |  | -0.22*** |  | -0.22*** |  |
|  |  |  | (-0.32, -0.14) |  | (-0.32, -0.13) |  | (-0.32, -0.13) |  |
|  | Time of Survey |  |  |  | -0.04 |  | -0.04 |  |
|  |  |  |  |  | (-0.12, 0.04) |  | (-0.12, 0.04) |  |
|  | News leaning |  |  |  | -0.01 |  | -0.01 |  |
|  |  |  |  |  | (-0.05, 0.03) |  | (-0.05, 0.03) |  |
|  | News leaning X Time |  |  |  |  |  | < - .01 |  |
|  |  |  |  |  |  |  | (-0.04, 0.03) |  |
|  |  |  |  |  |  |  |  |  |
|  | Observations |  | 572 |  | 572 |  | 572 |  |
|  | *F* (df) |  | 115.5 (df = 6, 565)*** |  | 86.62 (df = 8, 563)*** |  | 76.87 (df = 9, 562)*** |  |
|  | Overall *R*2 |  | .55 |  | .55 |  | .55 |  |
|  | Change in *R*2 |  |  |  | < .01 |  | < .01 |  |

**p* < .05, ***p* < .01, *** *p* < .001

| Table 1.3.2. Collective Response Efficacy Regressed onto Heard vs. Not Heard and News Leaning with Covariates | | | | | | | |  |
| --- | --- | --- | --- | --- | --- | --- | --- | --- |
|  | predictor |  | Base Model (95% CI) |  | Main Effects (95% CI) |  | Interactions (95% CI) |  |
|  | (Intercept) |  | 1.15*** |  | 1.16*** |  | 1.13*** |  |
|  |  |  | (1.02, 1.29) |  | (1.02, 1.29) |  | (0.99, 1.27) |  |
|  | SES |  | 0.09** |  | 0.09** |  | 0.09** |  |
|  |  |  | (0.02, 0.16) |  | (0.02, 0.16) |  | (0.02, 0.16) |  |
|  | Gender |  | < .01 |  | < - .01 |  | 0.01 |  |
|  |  |  | (-0.11, 0.12) |  | (-0.12, 0.12) |  | (-0.1, 0.13) |  |
|  | Age |  | < .01 |  | < .01 |  | < .01 |  |
|  |  |  | (-0.01, 0.01) |  | (-0.01, 0.01) |  | (-0.01, 0.01) |  |
|  | White |  | -0.17* |  | -0.18* |  | -0.19** |  |
|  |  |  | (-0.31, -0.04) |  | (-0.32, -0.04) |  | (-0.33, -0.05) |  |
|  | Climate change concern |  | -0.63*** |  | -0.63*** |  | -0.64*** |  |
|  |  |  | (-0.73, -0.54) |  | (-0.73, -0.53) |  | (-0.73, -0.54) |  |
|  | Political ideology |  | -0.28*** |  | -0.29*** |  | -0.27*** |  |
|  |  |  | (-0.41, -0.16) |  | (-0.43, -0.15) |  | (-0.41, -0.13) |  |
|  | Heard vs. Not Heard |  |  |  | 0.04 |  | 0.04 |  |
|  |  |  |  |  | (-0.08, 0.16) |  | (-0.08, 0.16) |  |
|  | News leaning |  |  |  | 0.01 |  | 0.01 |  |
|  |  |  |  |  | (-0.05, 0.07) |  | (-0.05, 0.06) |  |
|  | News leaning X Heard |  |  |  |  |  | -0.05* |  |
|  |  |  |  |  |  |  | (-0.10, -0.01) |  |
|  |  |  |  |  |  |  |  |  |
|  | Observations |  | 282 |  | 282 |  | 282 |  |
|  | *F* (df) |  | 75.26 (df = 6, 275)*** |  | 56.23 (df = 8, 273)*** |  | 51.27 (df = 9, 272)*** |  |
|  | Overall *R*2 |  | .62 |  | .62 |  | .63 |  |
|  | Change in *R*2 |  |  |  | < .01 |  | .01* |  |

**p* < .05, ***p* < .01, *** *p* < .001

| Table 1.4.1. Personal Response Efficacy Regressed onto Time of Survey and News Leaning with Covariates | | | | | | | |  |
| --- | --- | --- | --- | --- | --- | --- | --- | --- |
|  | predictor |  | Base Model (95% CI) |  | Main Effects (95% CI) |  | Interactions (95% CI) |  |
|  | (Intercept) |  | 0.85*** |  | 0.86*** |  | 0.86*** |  |
|  |  |  | (0.74, 0.97) |  | (0.75, 0.97) |  | (0.75, 0.97) |  |
|  | SES |  | 0.06 |  | 0.06* |  | 0.06* |  |
|  |  |  | (< - .01, 0.11) |  | (< .01, 0.12) |  | (< .01, 0.12) |  |
|  | Gender |  | -0.08 |  | -0.08 |  | -0.08 |  |
|  |  |  | (-0.18, 0.02) |  | (-0.18, 0.02) |  | (-0.18, 0.02) |  |
|  | Age |  | -0.01 |  | -0.01 |  | -0.01 |  |
|  |  |  | (-0.01, < .01) |  | (-0.01, < .01) |  | (-0.01, < .01) |  |
|  | White |  | -0.07 |  | -0.08 |  | -0.08 |  |
|  |  |  | (-0.18, 0.05) |  | (-0.19, 0.04) |  | (-0.19, 0.04) |  |
|  | Climate change concern |  | -0.38*** |  | -0.39*** |  | -0.39*** |  |
|  |  |  | (-0.46, -0.29) |  | (-0.48, -0.30) |  | (-0.48, -0.31) |  |
|  | Political ideology |  | -0.03 |  | -0.06 |  | -0.06 |  |
|  |  |  | (-0.14, 0.07) |  | (-0.17, 0.06) |  | (-0.18, 0.06) |  |
|  | Time of Survey |  |  |  | 0.06 |  | 0.06 |  |
|  |  |  |  |  | (-0.04, 0.16) |  | (-0.04, 0.16) |  |
|  | News leaning |  |  |  | 0.03 |  | 0.03 |  |
|  |  |  |  |  | (-0.02, 0.08) |  | (-0.02, 0.08) |  |
|  | News leaning X Time |  |  |  |  |  | 0.01 |  |
|  |  |  |  |  |  |  | (-0.03, 0.05) |  |
|  |  |  |  |  |  |  |  |  |
|  | Observations |  | 572 |  | 572 |  | 572 |  |
|  | *F* (df) |  | 22.67 (df = 6, 565)*** |  | 17.37 (df = 8, 563)*** |  | 15.46 (df = 9, 562)*** |  |
|  | Overall *R*2 |  | .19 |  | .20 |  | .20 |  |
|  | Change in *R*2 |  |  |  | < .01 |  | < .01 |  |

**p* < .05, ***p* < .01, *** *p* < .001

| Table 1.4.2. Personal Response Efficacy Regressed onto Heard vs. Not Heard and News Leaning with Covariates | | | | | | | |  |
| --- | --- | --- | --- | --- | --- | --- | --- | --- |
|  | predictor |  | Base Model (95% CI) |  | Main Effects (95% CI) |  | Interactions (95% CI) |  |
|  | (Intercept) |  | 0.88*** |  | 0.89*** |  | 0.86*** |  |
|  |  |  | (0.72, 1.05) |  | (0.73, 1.05) |  | (0.69, 1.02) |  |
|  | SES |  | 0.10* |  | 0.10* |  | 0.10* |  |
|  |  |  | (0.02, 0.18) |  | (0.02, 0.18) |  | (0.02, 0.18) |  |
|  | Gender |  | -0.04 |  | -0.04 |  | -0.02 |  |
|  |  |  | (-0.18, 0.10) |  | (-0.18, 0.10) |  | (-0.16, 0.12) |  |
|  | Age |  | -0.01 |  | -0.01 |  | -0.01 |  |
|  |  |  | (-0.02, < .01) |  | (-0.02, < .01) |  | (-0.02, < .01) |  |
|  | White |  | -0.02 |  | -0.04 |  | -0.05 |  |
|  |  |  | (-0.19, 0.14) |  | (-0.2, 0.13) |  | (-0.22, 0.11) |  |
|  | Climate change concern |  | -0.36*** |  | -0.37*** |  | -0.38*** |  |
|  |  |  | (-0.48, -0.25) |  | (-0.49, -0.26) |  | (-0.50, -0.26) |  |
|  | Political ideology |  | -0.04 |  | -0.08 |  | -0.05 |  |
|  |  |  | (-0.19, 0.12) |  | (-0.24, 0.09) |  | (-0.22, 0.12) |  |
|  | Heard vs. Not Heard |  |  |  | 0.01 |  | 0.02 |  |
|  |  |  |  |  | (-0.13, 0.16) |  | (-0.13, 0.16) |  |
|  | News leaning |  |  |  | 0.04 |  | 0.03 |  |
|  |  |  |  |  | (-0.03, 0.11) |  | (-0.04, 0.10) |  |
|  | News leaning X Heard |  |  |  |  |  | -0.08** |  |
|  |  |  |  |  |  |  | (-0.13, -0.02) |  |
|  |  |  |  |  |  |  |  |  |
|  | Observations |  | 282 |  | 282 |  | 282 |  |
|  | *F* (df) |  | 13.28 (df = 6, 275)*** |  | 10.09 (df = 8, 273)*** |  | 10 (df = 9, 272)*** |  |
|  | Overall *R*2 |  | .22 |  | .23 |  | .25 |  |
|  | Change in *R*2 |  |  |  | < .01 |  | .02** |  |

**p* < .05, ***p* < .01, *** *p* < .001

| Table 1.5.1. Personal Efficacy Regressed onto Time of Survey and News Leaning with Covariates | | | | | | | |  |
| --- | --- | --- | --- | --- | --- | --- | --- | --- |
|  | predictor |  | Base Model (95% CI) |  | Main Effects (95% CI) |  | Interactions (95% CI) |  |
|  | (Intercept) |  | 1.30*** |  | 1.30*** |  | 1.30*** |  |
|  |  |  | (1.19, 1.41) |  | (1.19, 1.42) |  | (1.19, 1.42) |  |
|  | SES |  | 0.10*** |  | 0.10*** |  | 0.10*** |  |
|  |  |  | (0.04, 0.16) |  | (0.04, 0.16) |  | (0.04, 0.16) |  |
|  | Gender |  | -0.02 |  | -0.02 |  | -0.02 |  |
|  |  |  | (-0.11, 0.08) |  | (-0.11, 0.08) |  | (-0.11, 0.08) |  |
|  | Age |  | < .01 |  | < .01 |  | < .01 |  |
|  |  |  | (< - .01, 0.01) |  | (< - .01, 0.01) |  | (< - .01, 0.01) |  |
|  | White |  | 0.08 |  | 0.07 |  | 0.07 |  |
|  |  |  | (-0.04, 0.19) |  | (-0.04, 0.18) |  | (-0.04, 0.18) |  |
|  | Climate change concern |  | -0.22*** |  | -0.23*** |  | -0.23*** |  |
|  |  |  | (-0.30, -0.14) |  | (-0.31, -0.14) |  | (-0.31, -0.14) |  |
|  | Political ideology |  | -0.05 |  | -0.06 |  | -0.06 |  |
|  |  |  | (-0.15, 0.05) |  | (-0.17, 0.05) |  | (-0.17, 0.05) |  |
|  | Time of Survey |  |  |  | 0.02 |  | 0.02 |  |
|  |  |  |  |  | (-0.08, 0.12) |  | (-0.08, 0.12) |  |
|  | News leaning |  |  |  | 0.01 |  | 0.01 |  |
|  |  |  |  |  | (-0.04, 0.06) |  | (-0.04, 0.06) |  |
|  | News leaning X Time |  |  |  |  |  | < .01 |  |
|  |  |  |  |  |  |  | (-0.04, 0.04) |  |
|  |  |  |  |  |  |  |  |  |
|  | Observations |  | 572 |  | 572 |  | 572 |  |
|  | *F* (df) |  | 10.68 (df = 6, 565)*** |  | 8.03 (df = 8, 563)*** |  | 7.12 (df = 9, 562)*** |  |
|  | Overall *R*2 |  | .10 |  | .10 |  | .10 |  |
|  | Change in *R*2 |  |  |  | < .01 |  | < .01 |  |

**p* < .05, ***p* < .01, *** *p* < .001

| Table 1.5.2. Personal Efficacy Regressed onto Heard vs. Not Heard and News Leaning with Covariates | | | | | | | |  |
| --- | --- | --- | --- | --- | --- | --- | --- | --- |
|  | predictor |  | Base Model (95% CI) |  | Main Effects (95% CI) |  | Interactions (95% CI) |  |
|  | (Intercept) |  | 1.34*** |  | 1.34*** |  | 1.32*** |  |
|  |  |  | (1.18, 1.50) |  | (1.17, 1.50) |  | (1.16, 1.48) |  |
|  | SES |  | 0.11** |  | 0.11** |  | 0.11** |  |
|  |  |  | (0.03, 0.2) |  | (0.03, 0.19) |  | (0.03, 0.19) |  |
|  | Gender |  | < .01 |  | -0.01 |  | < - .01 |  |
|  |  |  | (-0.14, 0.14) |  | (-0.15, 0.13) |  | (-0.14, 0.14) |  |
|  | Age |  | < .01 |  | < - .01 |  | < .01 |  |
|  |  |  | (-0.01, 0.01) |  | (-0.01, 0.01) |  | (-0.01, 0.01) |  |
|  | White |  | 0.04 |  | 0.02 |  | 0.01 |  |
|  |  |  | (-0.12, 0.2) |  | (-0.14, 0.18) |  | (-0.15, 0.18) |  |
|  | Climate change concern |  | -0.20** |  | -0.18** |  | -0.18** |  |
|  |  |  | (-0.31, -0.08) |  | (-0.30, -0.07) |  | (-0.30, -0.07) |  |
|  | Political ideology |  | -0.04 |  | -0.03 |  | -0.02 |  |
|  |  |  | (-0.19, 0.11) |  | (-0.19, 0.14) |  | (-0.18, 0.15) |  |
|  | Heard vs. Not Heard |  |  |  | 0.13 |  | 0.13 |  |
|  |  |  |  |  | (-0.01, 0.27) |  | (-0.01, 0.27) |  |
|  | News leaning |  |  |  | < .01 |  | < .01 |  |
|  |  |  |  |  | (-0.06, 0.07) |  | (-0.07, 0.07) |  |
|  | News leaning X Heard |  |  |  |  |  | -0.03 |  |
|  |  |  |  |  |  |  | (-0.09, 0.02) |  |
|  |  |  |  |  |  |  |  |  |
|  | Observations |  | 282 |  | 282 |  | 282 |  |
|  | *F* (df) |  | 4.95 (df = 6, 275)*** |  | 4.13 (df = 8, 273)*** |  | 3.83 (df = 9, 272)*** |  |
|  | Overall *R*2 |  | .10 |  | .11 |  | .11 |  |
|  | Change in *R*2 |  |  |  | .01 |  | < .01 |  |

**p* < .05, ***p* < .01, *** *p* < .001

| Table 2.1.1. Group Norms Regressed onto Time of Survey and News Leaning with Covariates | | | | | | | |  |
| --- | --- | --- | --- | --- | --- | --- | --- | --- |
|  | predictor |  | Base Model (95% CI) |  | Main Effects (95% CI) |  | Interactions (95% CI) |  |
|  | (Intercept) |  | 2.34*** |  | 2.33*** |  | 2.34*** |  |
|  |  |  | (2.23, 2.45) |  | (2.23, 2.44) |  | (2.23, 2.44) |  |
|  | SES |  | 0.05 |  | 0.05 |  | 0.05 |  |
|  |  |  | (< - .01, 0.10) |  | (-0.01, 0.10) |  | (-0.01, 0.10) |  |
|  | Gender |  | -0.11* |  | -0.11* |  | -0.11* |  |
|  |  |  | (-0.20, -0.02) |  | (-0.20, -0.01) |  | (-0.20, -0.02) |  |
|  | Age |  | -0.02*** |  | -0.02*** |  | -0.02*** |  |
|  |  |  | (-0.02, -0.01) |  | (-0.02, -0.01) |  | (-0.02, -0.01) |  |
|  | White |  | -0.02 |  | -0.02 |  | -0.02 |  |
|  |  |  | (-0.13, 0.08) |  | (-0.13, 0.09) |  | (-0.13, 0.08) |  |
|  | Climate change concern |  | -0.11** |  | -0.09* |  | -0.1* |  |
|  |  |  | (-0.19, -0.03) |  | (-0.18, -0.01) |  | (-0.18, -0.02) |  |
|  | Political ideology |  | -0.12* |  | -0.10 |  | -0.10 |  |
|  |  |  | (-0.22, -0.02) |  | (-0.21, 0.01) |  | (-0.21, 0.01) |  |
|  | Time of Survey |  |  |  | -0.06 |  | -0.05 |  |
|  |  |  |  |  | (-0.15, 0.04) |  | (-0.15, 0.04) |  |
|  | News leaning |  |  |  | -0.02 |  | -0.02 |  |
|  |  |  |  |  | (-0.07, 0.02) |  | (-0.07, 0.02) |  |
|  | News leaning X Time |  |  |  |  |  | 0.05* |  |
|  |  |  |  |  |  |  | (0.01, 0.08) |  |
|  |  |  |  |  |  |  |  |  |
|  | Observations |  | 572 |  | 572 |  | 572 |  |
|  | *F* (df) |  | 9.62 (df = 6, 565)*** |  | 7.54 (df = 8, 563)*** |  | 7.44 (df = 9, 562)*** |  |
|  | Overall *R*2 |  | .09 |  | .10 |  | .11 |  |
|  | Change in *R*2 |  |  |  | < .01 |  | .01* |  |

**p* < .05, ***p* < .01, *** *p* < .001

| Table 2.1.2. Group Norms Regressed onto Heard vs. Not Heard and News Leaning with Covariates | | | | | | | |  |
| --- | --- | --- | --- | --- | --- | --- | --- | --- |
|  | predictor |  | Base Model (95% CI) |  | Main Effects (95% CI) |  | Interactions (95% CI) |  |
|  | (Intercept) |  | 2.32*** |  | 2.33*** |  | 2.33*** |  |
|  |  |  | (2.17, 2.47) |  | (2.18, 2.48) |  | (2.17, 2.48) |  |
|  | SES |  | 0.09* |  | 0.09* |  | 0.09* |  |
|  |  |  | (0.02, 0.17) |  | (0.02, 0.17) |  | (0.02, 0.17) |  |
|  | Gender |  | -0.15* |  | -0.15* |  | -0.15* |  |
|  |  |  | (-0.28, -0.02) |  | (-0.28, -0.02) |  | (-0.28, -0.02) |  |
|  | Age |  | -0.01* |  | -0.01* |  | -0.01* |  |
|  |  |  | (-0.02, < - .01) |  | (-0.02, < - .01) |  | (-0.02, < - .01) |  |
|  | White |  | -0.08 |  | -0.09 |  | -0.09 |  |
|  |  |  | (-0.23, 0.07) |  | (-0.24, 0.06) |  | (-0.25, 0.06) |  |
|  | Climate change concern |  | -0.07 |  | -0.08 |  | -0.08 |  |
|  |  |  | (-0.18, 0.04) |  | (-0.19, 0.02) |  | (-0.19, 0.02) |  |
|  | Political ideology |  | -0.15* |  | -0.20* |  | -0.20* |  |
|  |  |  | (-0.29, -0.01) |  | (-0.35, -0.04) |  | (-0.35, -0.04) |  |
|  | Heard vs. Not Heard |  |  |  | 0.02 |  | 0.02 |  |
|  |  |  |  |  | (-0.12, 0.15) |  | (-0.12, 0.15) |  |
|  | News leaning |  |  |  | 0.05 |  | 0.05 |  |
|  |  |  |  |  | (-0.02, 0.11) |  | (-0.02, 0.11) |  |
|  | News leaning X Heard |  |  |  |  |  | < - .01 |  |
|  |  |  |  |  |  |  | (-0.06, 0.05) |  |
|  |  |  |  |  |  |  |  |  |
|  | Observations |  | 282 |  | 282 |  | 282 |  |
|  | *F* (df) |  | 5.67 (df = 6, 275)*** |  | 4.53 (df = 8, 273)*** |  | 4.02 (df = 9, 272)*** |  |
|  | Overall *R*2 |  | .11 |  | .12 |  | .12 |  |
|  | Change in *R*2 |  |  |  | .01 |  | < .01 |  |

**p* < .05, ***p* < .01, *** *p* < .001

| Table 2.2.1. Community Norms Regressed onto Time of Survey and News Leaning with Covariates | | | | | | | |  |
| --- | --- | --- | --- | --- | --- | --- | --- | --- |
|  | predictor |  | Base Model (95% CI) |  | Main Effects (95% CI) |  | Interactions (95% CI) |  |
|  | (Intercept) |  | 1.89*** |  | 1.89*** |  | 1.89*** |  |
|  |  |  | (1.77, 2.01) |  | (1.77, 2.01) |  | (1.77, 2.01) |  |
|  | SES |  | 0.08** |  | 0.08** |  | 0.08** |  |
|  |  |  | (0.02, 0.14) |  | (0.02, 0.14) |  | (0.02, 0.15) |  |
|  | Gender |  | -0.04 |  | -0.05 |  | -0.05 |  |
|  |  |  | (-0.14, 0.06) |  | (-0.15, 0.06) |  | (-0.15, 0.06) |  |
|  | Age |  | -0.02*** |  | -0.02*** |  | -0.02** |  |
|  |  |  | (-0.02, -0.01) |  | (-0.02, -0.01) |  | (-0.02, -0.01) |  |
|  | White |  | -0.01 |  | < - .01 |  | -0.01 |  |
|  |  |  | (-0.13, 0.11) |  | (-0.13, 0.12) |  | (-0.13, 0.11) |  |
|  | Climate change concern |  | -0.16*** |  | -0.15** |  | -0.16** |  |
|  |  |  | (-0.25, -0.07) |  | (-0.24, -0.06) |  | (-0.25, -0.07) |  |
|  | Political ideology |  | -0.12* |  | -0.09 |  | -0.09 |  |
|  |  |  | (-0.23, < - .01) |  | (-0.21, 0.04) |  | (-0.21, 0.03) |  |
|  | Time of Survey |  |  |  | 0.02 |  | 0.02 |  |
|  |  |  |  |  | (-0.09, 0.12) |  | (-0.09, 0.12) |  |
|  | News leaning |  |  |  | -0.03 |  | -0.03 |  |
|  |  |  |  |  | (-0.08, 0.02) |  | (-0.08, 0.02) |  |
|  | News leaning X Time |  |  |  |  |  | 0.03 |  |
|  |  |  |  |  |  |  | (-0.01, 0.07) |  |
|  |  |  |  |  |  |  |  |  |
|  | Observations |  | 569 |  | 569 |  | 569 |  |
|  | *F* (df) |  | 9.64 (df = 6, 562)*** |  | 7.39 (df = 8, 560)*** |  | 6.85 (df = 9, 559)*** |  |
|  | Overall *R*2 |  | .09 |  | .10 |  | .10 |  |
|  | Change in *R*2 |  |  |  | < .01 |  | < .01 |  |

**p* < .05, ***p* < .01, *** *p* < .001

| Table 2.2.2. Community Norms Regressed onto Heard vs. Not Heard and News Leaning with Covariates | | | | | | | |  |
| --- | --- | --- | --- | --- | --- | --- | --- | --- |
|  | predictor |  | Base Model (95% CI) |  | Main Effects (95% CI) |  | Interactions (95% CI) |  |
|  | (Intercept) |  | 1.92*** |  | 1.92*** |  | 1.91*** |  |
|  |  |  | (1.75, 2.08) |  | (1.75, 2.08) |  | (1.74, 2.09) |  |
|  | SES |  | 0.13** |  | 0.14** |  | 0.14** |  |
|  |  |  | (0.05, 0.22) |  | (0.05, 0.22) |  | (0.05, 0.22) |  |
|  | Gender |  | -0.09 |  | -0.08 |  | -0.08 |  |
|  |  |  | (-0.23, 0.06) |  | (-0.23, 0.06) |  | (-0.23, 0.07) |  |
|  | Age |  | -0.01* |  | -0.01* |  | -0.01* |  |
|  |  |  | (-0.03, < - .01) |  | (-0.03, < - .01) |  | (-0.03, < - .01) |  |
|  | White |  | < - .01 |  | 0.01 |  | 0.01 |  |
|  |  |  | (-0.17, 0.17) |  | (-0.16, 0.18) |  | (-0.17, 0.18) |  |
|  | Climate change concern |  | -0.11 |  | -0.12 |  | -0.12 |  |
|  |  |  | (-0.23, 0.01) |  | (-0.24, 0.01) |  | (-0.24, 0.01) |  |
|  | Political ideology |  | -0.11 |  | -0.1 |  | -0.1 |  |
|  |  |  | (-0.27, 0.05) |  | (-0.28, 0.07) |  | (-0.28, 0.07) |  |
|  | Heard vs. Not Heard |  |  |  | -0.05 |  | -0.05 |  |
|  |  |  |  |  | (-0.2, 0.10) |  | (-0.2, 0.10) |  |
|  | News leaning |  |  |  | -0.01 |  | -0.01 |  |
|  |  |  |  |  | (-0.08, 0.06) |  | (-0.08, 0.06) |  |
|  | News leaning X Heard |  |  |  |  |  | < - .01 |  |
|  |  |  |  |  |  |  | (-0.06, 0.05) |  |
|  |  |  |  |  |  |  |  |  |
|  | Observations |  | 282 |  | 282 |  | 282 |  |
|  | *F* (df) |  | 5.04 (df = 6, 275)*** |  | 3.83 (df = 8, 273)*** |  | 3.39 (df = 9, 272)** |  |
|  | Overall *R*2 |  | .10 |  | .10 |  | .10 |  |
|  | Change in *R*2 |  |  |  | < .01 |  | < .01 |  |

**p* < .05, ***p* < .01, *** *p* < .001

| Table 3.1.1. Meta-perceptions–Public Concern Regressed onto Time of Survey and News Leaning with Covariates | | | | | | | |  |
| --- | --- | --- | --- | --- | --- | --- | --- | --- |
|  | predictor |  | Base Model (95% CI) |  | Main Effects (95% CI) |  | Interactions (95% CI) |  |
|  | (Intercept) |  | 3.16*** |  | 3.16*** |  | 3.16*** |  |
|  |  |  | (3.06, 3.26) |  | (3.06, 3.26) |  | (3.06, 3.26) |  |
|  | SES |  | 0.04 |  | 0.04 |  | 0.04 |  |
|  |  |  | (-0.01, 0.09) |  | (-0.02, 0.09) |  | (-0.02, 0.09) |  |
|  | Gender |  | 0.03 |  | 0.03 |  | 0.03 |  |
|  |  |  | (-0.06, 0.12) |  | (-0.06, 0.12) |  | (-0.06, 0.12) |  |
|  | Age |  | < .01 |  | < .01 |  | < .01 |  |
|  |  |  | (-0.01, 0.01) |  | (-0.01, 0.01) |  | (-0.01, 0.01) |  |
|  | White |  | < .01 |  | 0.01 |  | 0.01 |  |
|  |  |  | (-0.10, 0.11) |  | (-0.10, 0.11) |  | (-0.1, 0.11) |  |
|  | Climate change concern |  | -0.14*** |  | -0.13** |  | -0.13** |  |
|  |  |  | (-0.22, -0.06) |  | (-0.2, -0.05) |  | (-0.21, -0.05) |  |
|  | Political ideology |  | -0.02 |  | -0.01 |  | -0.01 |  |
|  |  |  | (-0.12, 0.07) |  | (-0.11, 0.10) |  | (-0.11, 0.10) |  |
|  | Time of Survey |  |  |  | -0.06 |  | -0.06 |  |
|  |  |  |  |  | (-0.15, 0.02) |  | (-0.15, 0.02) |  |
|  | News leaning |  |  |  | -0.02 |  | -0.02 |  |
|  |  |  |  |  | (-0.07, 0.02) |  | (-0.06, 0.02) |  |
|  | News leaning X Time |  |  |  |  |  | 0.01 |  |
|  |  |  |  |  |  |  | (-0.02, 0.04) |  |
|  |  |  |  |  |  |  |  |  |
|  | Observations |  | 572 |  | 572 |  | 572 |  |
|  | *F* (df) |  | 4.12 (df = 6, 565)*** |  | 3.47 (df = 8, 563)** |  | 3.11 (df = 9, 562)** |  |
|  | Overall *R*2 |  | .04 |  | .05 |  | .05 |  |
|  | Change in *R*2 |  |  |  | .01 |  | < .01 |  |

**p* < .05, ***p* < .01, *** *p* < .001

| Table 3.1.2. Meta-perceptions–Public Concern Regressed onto Heard vs. Not Heard and News Leaning with Covariates | | | | | | | |  |
| --- | --- | --- | --- | --- | --- | --- | --- | --- |
|  | predictor |  | Base Model (95% CI) |  | Main Effects (95% CI) |  | Interactions (95% CI) |  |
|  | (Intercept) |  | 3.02*** |  | 3.02*** |  | 3.02*** |  |
|  |  |  | (2.87, 3.17) |  | (2.87, 3.17) |  | (2.87, 3.18) |  |
|  | SES |  | 0.05 |  | 0.05 |  | 0.05 |  |
|  |  |  | (-0.02, 0.13) |  | (-0.02, 0.13) |  | (-0.02, 0.13) |  |
|  | Gender |  | < .01 |  | < .01 |  | < - .01 |  |
|  |  |  | (-0.13, 0.13) |  | (-0.13, 0.13) |  | (-0.13, 0.13) |  |
|  | Age |  | < .01 |  | < .01 |  | < .01 |  |
|  |  |  | (-0.01, 0.02) |  | (-0.01, 0.02) |  | (-0.01, 0.02) |  |
|  | White |  | 0.16* |  | 0.16* |  | 0.16* |  |
|  |  |  | (0.01, 0.31) |  | (0.01, 0.31) |  | (0.01, 0.32) |  |
|  | Climate change concern |  | -0.13* |  | -0.13* |  | -0.13* |  |
|  |  |  | (-0.23, -0.02) |  | (-0.24, -0.02) |  | (-0.23, -0.02) |  |
|  | Political ideology |  | -0.09 |  | -0.08 |  | -0.09 |  |
|  |  |  | (-0.22, 0.05) |  | (-0.24, 0.07) |  | (-0.25, 0.07) |  |
|  | Heard vs. Not Heard |  |  |  | 0.02 |  | 0.02 |  |
|  |  |  |  |  | (-0.12, 0.15) |  | (-0.12, 0.15) |  |
|  | News leaning |  |  |  | < .01 |  | < .01 |  |
|  |  |  |  |  | (-0.06, 0.06) |  | (-0.06, 0.07) |  |
|  | News leaning X Heard |  |  |  |  |  | 0.01 |  |
|  |  |  |  |  |  |  | (-0.04, 0.06) |  |
|  |  |  |  |  |  |  |  |  |
|  | Observations |  | 282 |  | 282 |  | 282 |  |
|  | *F* (df) |  | 3.75 (df = 6, 275)** |  | 2.8 (df = 8, 273)** |  | 2.51 (df = 9, 272)** |  |
|  | Overall *R*2 |  | .08 |  | .08 |  | .08 |  |
|  | Change in *R*2 |  |  |  | < .01 |  | < .01 |  |

**p* < .05, ***p* < .01, *** *p* < .001

| Table 3.2.1. Meta-perceptions–Community Concern Regressed onto Time of Survey and News Leaning with Covariates | | | | | | | |  |
| --- | --- | --- | --- | --- | --- | --- | --- | --- |
|  | predictor |  | Base Model (95% CI) |  | Main Effects (95% CI) |  | Interactions (95% CI) |  |
|  | (Intercept) |  | 2.88*** |  | 2.87*** |  | 2.87*** |  |
|  |  |  | (2.75, 3) |  | (2.75, 3) |  | (2.75, 3) |  |
|  | SES |  | 0.12*** |  | 0.12*** |  | 0.12*** |  |
|  |  |  | (0.06, 0.18) |  | (0.06, 0.18) |  | (0.06, 0.18) |  |
|  | Gender |  | 0.05 |  | 0.05 |  | 0.05 |  |
|  |  |  | (-0.05, 0.16) |  | (-0.05, 0.16) |  | (-0.06, 0.16) |  |
|  | Age |  | < - .01 |  | < .01 |  | < .01 |  |
|  |  |  | (-0.01, 0.01) |  | (-0.01, 0.01) |  | (-0.01, 0.01) |  |
|  | White |  | 0.03 |  | 0.04 |  | 0.04 |  |
|  |  |  | (-0.09, 0.16) |  | (-0.08, 0.16) |  | (-0.09, 0.16) |  |
|  | Climate change concern |  | -0.32*** |  | -0.3*** |  | -0.31*** |  |
|  |  |  | (-0.4, -0.23) |  | (-0.4, -0.21) |  | (-0.4, -0.22) |  |
|  | Political ideology |  | -0.09 |  | -0.07 |  | -0.07 |  |
|  |  |  | (-0.2, 0.02) |  | (-0.19, 0.06) |  | (-0.19, 0.06) |  |
|  | Time of Survey |  |  |  | -0.02 |  | -0.02 |  |
|  |  |  |  |  | (-0.12, 0.09) |  | (-0.12, 0.09) |  |
|  | News leaning |  |  |  | -0.03 |  | -0.03 |  |
|  |  |  |  |  | (-0.08, 0.02) |  | (-0.08, 0.03) |  |
|  | News leaning X Time |  |  |  |  |  | 0.02 |  |
|  |  |  |  |  |  |  | (-0.02, 0.06) |  |
|  |  |  |  |  |  |  |  |  |
|  | Observations |  | 569 |  | 569 |  | 569 |  |
|  | *F* (df) |  | 17.17 (df = 6, 562)*** |  | 13.01 (df = 8, 560)*** |  | 11.69 (df = 9, 559)*** |  |
|  | Overall *R*2 |  | .15 |  | .16 |  | .16 |  |
|  | Change in *R*2 |  |  |  | < .01 |  | < .01 |  |

**p* < .05, ***p* < .01, *** *p* < .001

| Table 3.2.2. Meta-perceptions–Community Concern Regressed onto Heard vs. Not Heard and News Leaning with Covariates | | | | | | | |  |
| --- | --- | --- | --- | --- | --- | --- | --- | --- |
|  | predictor |  | Base Model (95% CI) |  | Main Effects (95% CI) |  | Interactions (95% CI) |  |
|  | (Intercept) |  | 2.78*** |  | 2.77*** |  | 2.79*** |  |
|  |  |  | (2.61, 2.95) |  | (2.60, 2.95) |  | (2.61, 2.96) |  |
|  | SES |  | 0.10* |  | 0.10* |  | 0.10* |  |
|  |  |  | (0.02, 0.19) |  | (0.02, 0.19) |  | (0.02, 0.19) |  |
|  | Gender |  | 0.10 |  | 0.10 |  | 0.09 |  |
|  |  |  | (-0.05, 0.25) |  | (-0.05, 0.25) |  | (-0.06, 0.24) |  |
|  | Age |  | 0.01 |  | 0.01 |  | 0.01 |  |
|  |  |  | (< - .01, 0.02) |  | (< - .01, 0.02) |  | (< - .01, 0.02) |  |
|  | White |  | 0.17 |  | 0.18* |  | 0.19* |  |
|  |  |  | (< - .01, 0.34) |  | (< .01, 0.36) |  | (0.01, 0.36) |  |
|  | Climate change concern |  | -0.34*** |  | -0.34*** |  | -0.34*** |  |
|  |  |  | (-0.46, -0.22) |  | (-0.46, -0.21) |  | (-0.46, -0.21) |  |
|  | Political ideology |  | -0.02 |  | 0.01 |  | < .01 |  |
|  |  |  | (-0.18, 0.14) |  | (-0.17, 0.19) |  | (-0.18, 0.18) |  |
|  | Heard vs. Not Heard |  |  |  | -0.02 |  | -0.02 |  |
|  |  |  |  |  | (-0.18, 0.13) |  | (-0.18, 0.13) |  |
|  | News leaning |  |  |  | -0.03 |  | -0.02 |  |
|  |  |  |  |  | (-0.10, 0.05) |  | (-0.1, 0.05) |  |
|  | News leaning X Heard |  |  |  |  |  | 0.02 |  |
|  |  |  |  |  |  |  | (-0.03, 0.08) |  |
|  |  |  |  |  |  |  |  |  |
|  | Observations |  | 281 |  | 281 |  | 281 |  |
|  | *F* (df) |  | 10.07 (df = 6, 274)*** |  | 7.59 (df = 8, 272)*** |  | 6.82 (df = 9, 271)*** |  |
|  | Overall *R*2 |  | .18 |  | .18 |  | .18 |  |
|  | Change in *R*2 |  |  |  | < .01 |  | < .01 |  |

**p* < .05, ***p* < .01, *** *p* < .001

| Table 3.3.1. Meta-perceptions–Friends and Family Concern Regressed onto Time of Survey and News Leaning with Covariates | | | | | | | |  |
| --- | --- | --- | --- | --- | --- | --- | --- | --- |
|  | predictor |  | Base Model (95% CI) |  | Main Effects (95% CI) |  | Interactions (95% CI) |  |
|  | (Intercept) |  | 3.12*** |  | 3.12*** |  | 3.12*** |  |
|  |  |  | (2.99, 3.25) |  | (2.99, 3.25) |  | (2.99, 3.25) |  |
|  | SES |  | 0.10** |  | 0.10** |  | 0.10** |  |
|  |  |  | (0.03, 0.17) |  | (0.03, 0.17) |  | (0.03, 0.17) |  |
|  | Gender |  | 0.12* |  | 0.12* |  | 0.11 |  |
|  |  |  | (0.01, 0.24) |  | (< .01, 0.23) |  | (< - .01, 0.23) |  |
|  | Age |  | < .01 |  | < .01 |  | < .01 |  |
|  |  |  | (-0.01, 0.01) |  | (-0.01, 0.01) |  | (-0.01, 0.01) |  |
|  | White |  | 0.06 |  | 0.07 |  | 0.06 |  |
|  |  |  | (-0.07, 0.19) |  | (-0.07, 0.20) |  | (-0.07, 0.20) |  |
|  | Climate change concern |  | -0.54*** |  | -0.54*** |  | -0.54*** |  |
|  |  |  | (-0.64, -0.45) |  | (-0.64, -0.44) |  | (-0.64, -0.44) |  |
|  | Political ideology |  | -0.26*** |  | -0.24*** |  | -0.24*** |  |
|  |  |  | (-0.38, -0.14) |  | (-0.37, -0.11) |  | (-0.38, -0.11) |  |
|  | Time of Survey |  |  |  | 0.02 |  | 0.02 |  |
|  |  |  |  |  | (-0.10, 0.13) |  | (-0.10, 0.13) |  |
|  | News leaning |  |  |  | -0.02 |  | -0.02 |  |
|  |  |  |  |  | (-0.08, 0.03) |  | (-0.08, 0.04) |  |
|  | News leaning X Time |  |  |  |  |  | 0.04 |  |
|  |  |  |  |  |  |  | (< - .01, 0.09) |  |
|  |  |  |  |  |  |  |  |  |
|  | Observations |  | 570 |  | 570 |  | 570 |  |
|  | *F* (df) |  | 47.34 (df = 6, 563)*** |  | 35.51 (df = 8, 561)*** |  | 32.03 (df = 9, 560)*** |  |
|  | Overall *R*2 |  | .34 |  | .34 |  | .34 |  |
|  | Change in *R*2 |  |  |  | < .01 |  | < .01 |  |

**p* < .05, ***p* < .01, *** *p* < .001

| Table 3.3.2. Meta-perceptions–Friends and Family Concern Regressed onto Heard vs. Not Heard and News Leaning with Covariates | | | | | | | |  |
| --- | --- | --- | --- | --- | --- | --- | --- | --- |
|  | predictor |  | Base Model (95% CI) |  | Main Effects (95% CI) |  | Interactions (95% CI) |  |
|  | (Intercept) |  | 3.09*** |  | 3.10*** |  | 3.12*** |  |
|  |  |  | (2.91, 3.28) |  | (2.91, 3.28) |  | (2.93, 3.31) |  |
|  | SES |  | 0.12* |  | 0.12* |  | 0.12* |  |
|  |  |  | (0.02, 0.21) |  | (0.02, 0.21) |  | (0.02, 0.21) |  |
|  | Gender |  | 0.10 |  | 0.11 |  | 0.10 |  |
|  |  |  | (-0.05, 0.26) |  | (-0.05, 0.27) |  | (-0.06, 0.26) |  |
|  | Age |  | 0.01 |  | 0.01 |  | 0.01 |  |
|  |  |  | (-0.01, 0.02) |  | (-0.01, 0.02) |  | (-0.01, 0.02) |  |
|  | White |  | 0.16 |  | 0.17 |  | 0.18 |  |
|  |  |  | (-0.02, 0.35) |  | (-0.02, 0.35) |  | (-0.01, 0.36) |  |
|  | Climate change concern |  | -0.60*** |  | -0.61*** |  | -0.60*** |  |
|  |  |  | (-0.72, -0.47) |  | (-0.74, -0.47) |  | (-0.74, -0.47) |  |
|  | Political ideology |  | -0.16 |  | -0.17 |  | -0.19 |  |
|  |  |  | (-0.33, 0.01) |  | (-0.36, 0.02) |  | (-0.38, < .01) |  |
|  | Heard vs. Not Heard |  |  |  | -0.06 |  | -0.06 |  |
|  |  |  |  |  | (-0.23, 0.10) |  | (-0.23, 0.10) |  |
|  | News leaning |  |  |  | 0.01 |  | 0.01 |  |
|  |  |  |  |  | (-0.07, 0.09) |  | (-0.07, 0.09) |  |
|  | News leaning X Heard |  |  |  |  |  | 0.05 |  |
|  |  |  |  |  |  |  | (-0.02, 0.11) |  |
|  |  |  |  |  |  |  |  |  |
|  | Observations |  | 282 |  | 282 |  | 282 |  |
|  | *F* (df) |  | 29.35 (df = 6, 275)*** |  | 21.98 (df = 8, 273)*** |  | 19.86 (df = 9, 272)*** |  |
|  | Overall *R*2 |  | .39 |  | .39 |  | .40 |  |
|  | Change in *R*2 |  |  |  | < .01 |  | < .01 |  |

**p* < .05, ***p* < .01, *** *p* < .001

| Table 4.1.1. Negative Masculine Traits Regressed onto Time of Survey and News Leaning with Covariates | | | | | | | |  |
| --- | --- | --- | --- | --- | --- | --- | --- | --- |
|  | predictor |  | Base Model (95% CI) |  | Main Effects (95% CI) |  | Interactions (95% CI) |  |
|  | (Intercept) |  | 1.24*** |  | 1.24*** |  | 1.24*** |  |
|  |  |  | (1.15, 1.33) |  | (1.15, 1.33) |  | (1.15, 1.33) |  |
|  | SES |  | 0.04 |  | 0.04 |  | 0.04 |  |
|  |  |  | (< - .01, 0.09) |  | (-0.01, 0.08) |  | (-0.01, 0.08) |  |
|  | Gender |  | 0.04 |  | 0.06 |  | 0.06 |  |
|  |  |  | (-0.04, 0.12) |  | (-0.01, 0.14) |  | (-0.01, 0.14) |  |
|  | Age |  | 0.01 |  | 0.01 |  | 0.01 |  |
|  |  |  | (< .01, 0.01) |  | (< .01, 0.01) |  | (< - .01, 0.01) |  |
|  | White |  | -0.01 |  | -0.02 |  | -0.02 |  |
|  |  |  | (-0.1, 0.08) |  | (-0.11, 0.07) |  | (-0.11, 0.07) |  |
|  | Climate change concern |  | 0.27*** |  | 0.26*** |  | 0.26*** |  |
|  |  |  | (0.2, 0.33) |  | (0.19, 0.32) |  | (0.19, 0.32) |  |
|  | Political ideology |  | 0.30*** |  | 0.24*** |  | 0.24*** |  |
|  |  |  | (0.22, 0.38) |  | (0.16, 0.33) |  | (0.16, 0.33) |  |
|  | Time of Survey |  |  |  | -0.12** |  | -0.12** |  |
|  |  |  |  |  | (-0.19, -0.04) |  | (-0.19, -0.04) |  |
|  | News leaning |  |  |  | 0.05** |  | 0.05** |  |
|  |  |  |  |  | (0.02, 0.09) |  | (0.02, 0.09) |  |
|  | News leaning X Time |  |  |  |  |  | -0.01 |  |
|  |  |  |  |  |  |  | (-0.04, 0.02) |  |
|  |  |  |  |  |  |  |  |  |
|  | Observations |  | 572 |  | 572 |  | 572 |  |
|  | *F* (df) |  | 49.23 (df = 6, 565)*** |  | 40.07 (df = 8, 563)*** |  | 35.58 (df = 9, 562)*** |  |
|  | Overall *R*2 |  | .34 |  | .36 |  | .36 |  |
|  | Change in *R*2 |  |  |  | 0.02*** |  | < .01 |  |

**p* < .05, ***p* < .01, *** *p* < .001

| Table 4.1.2. Negative Masculine Traits Regressed onto Heard vs. Not Heard and News Leaning with Covariates | | | | | | | |  |
| --- | --- | --- | --- | --- | --- | --- | --- | --- |
|  | predictor |  | Base Model (95% CI) |  | Main Effects (95% CI) |  | Interactions (95% CI) |  |
|  | (Intercept) |  | 1.08*** |  | 1.08*** |  | 1.10*** |  |
|  |  |  | (0.96, 1.2) |  | (0.97, 1.2) |  | (0.98, 1.22) |  |
|  | SES |  | 0.02 |  | 0.02 |  | 0.02 |  |
|  |  |  | (-0.04, 0.08) |  | (-0.04, 0.08) |  | (-0.04, 0.08) |  |
|  | Gender |  | 0.09 |  | 0.09 |  | 0.08 |  |
|  |  |  | (-0.01, 0.19) |  | (-0.01, 0.19) |  | (-0.02, 0.18) |  |
|  | Age |  | 0.01* |  | 0.01* |  | 0.01* |  |
|  |  |  | (< .01, 0.02) |  | (< .01, 0.02) |  | (< .01, 0.02) |  |
|  | White |  | 0.06 |  | 0.05 |  | 0.06 |  |
|  |  |  | (-0.06, 0.17) |  | (-0.07, 0.17) |  | (-0.06, 0.18) |  |
|  | Climate change concern |  | 0.27*** |  | 0.26*** |  | 0.26*** |  |
|  |  |  | (0.19, 0.36) |  | (0.17, 0.34) |  | (0.18, 0.34) |  |
|  | Political ideology |  | 0.30*** |  | 0.26*** |  | 0.25*** |  |
|  |  |  | (0.19, 0.41) |  | (0.14, 0.38) |  | (0.12, 0.37) |  |
|  | Heard vs. Not Heard |  |  |  | -0.02 |  | -0.02 |  |
|  |  |  |  |  | (-0.13, 0.08) |  | (-0.13, 0.08) |  |
|  | News leaning |  |  |  | 0.04 |  | 0.04 |  |
|  |  |  |  |  | (-0.01, 0.09) |  | (-0.01, 0.09) |  |
|  | News leaning X Heard |  |  |  |  |  | 0.04 |  |
|  |  |  |  |  |  |  | (< .01, 0.08) |  |
|  |  |  |  |  |  |  |  |  |
|  | Observations |  | 282 |  | 282 |  | 282 |  |
|  | *F* (df) |  | 34.5 (df = 6, 275)*** |  | 26.22 (df = 8, 273)*** |  | 23.97 (df = 9, 272)*** |  |
|  | Overall *R*2 |  | .43 |  | .43 |  | .44 |  |
|  | Change in *R*2 |  |  |  | .01 |  | .01 |  |

**p* < .05, ***p* < .01, *** *p* < .001

| Table 4.2.1. Negative Feminine Traits Regressed onto Time of Survey and News Leaning with Covariates | | | | | | | |  |
| --- | --- | --- | --- | --- | --- | --- | --- | --- |
|  | predictor |  | Base Model (95% CI) |  | Main Effects (95% CI) |  | Interactions (95% CI) |  |
|  | (Intercept) |  | 1.38*** |  | 1.39*** |  | 1.39*** |  |
|  |  |  | (1.29, 1.48) |  | (1.30, 1.48) |  | (1.30, 1.48) |  |
|  | SES |  | 0.02 |  | 0.02 |  | 0.02 |  |
|  |  |  | (-0.03, 0.07) |  | (-0.03, 0.07) |  | (-0.03, 0.07) |  |
|  | Gender |  | 0.15*** |  | 0.17*** |  | 0.17*** |  |
|  |  |  | (0.07, 0.23) |  | (0.09, 0.25) |  | (0.09, 0.25) |  |
|  | Age |  | < .01 |  | < .01 |  | < .01 |  |
|  |  |  | (< - .01, 0.01) |  | (-0.01, 0.01) |  | (-0.01, 0.01) |  |
|  | White |  | -0.01 |  | -0.02 |  | -0.02 |  |
|  |  |  | (-0.10, 0.08) |  | (-0.12, 0.07) |  | (-0.11, 0.07) |  |
|  | Climate change concern |  | 0.32*** |  | 0.30*** |  | 0.30*** |  |
|  |  |  | (0.25, 0.39) |  | (0.23, 0.37) |  | (0.23, 0.37) |  |
|  | Political ideology |  | 0.36*** |  | 0.29*** |  | 0.30*** |  |
|  |  |  | (0.28, 0.45) |  | (0.20, 0.39) |  | (0.20, 0.39) |  |
|  | Time of Survey |  |  |  | -0.06 |  | -0.06 |  |
|  |  |  |  |  | (-0.14, 0.02) |  | (-0.14, 0.02) |  |
|  | News leaning |  |  |  | 0.07** |  | 0.07** |  |
|  |  |  |  |  | (0.03, 0.11) |  | (0.03, 0.11) |  |
|  | News leaning X Time |  |  |  |  |  | -0.01 |  |
|  |  |  |  |  |  |  | (-0.04, 0.02) |  |
|  |  |  |  |  |  |  |  |  |
|  | Observations |  | 572 |  | 572 |  | 572 |  |
|  | *F* (df) |  | 63.46 (df = 6, 565)*** |  | 50.27 (df = 8, 563)*** |  | 44.74 (df = 9, 562)*** |  |
|  | Overall *R*2 |  | .40 |  | .42 |  | .42 |  |
|  | Change in *R*2 |  |  |  | .01** |  | < .01 |  |

**p* < .05, ***p* < .01, *** *p* < .001

| Table 4.2.2. Negative Feminine Traits Regressed onto Heard vs. Not Heard and News Leaning with Covariates | | | | | | | |  |
| --- | --- | --- | --- | --- | --- | --- | --- | --- |
|  | predictor |  | Base Model (95% CI) |  | Main Effects (95% CI) |  | Interactions (95% CI) |  |
|  | (Intercept) |  | 1.30*** |  | 1.31*** |  | 1.33*** |  |
|  |  |  | (1.16, 1.43) |  | (1.17, 1.44) |  | (1.20, 1.47) |  |
|  | SES |  | < .01 |  | 0.01 |  | < .01 |  |
|  |  |  | (-0.06, 0.07) |  | (-0.06, 0.07) |  | (-0.06, 0.07) |  |
|  | Gender |  | 0.20** |  | 0.21*** |  | 0.19** |  |
|  |  |  | (0.09, 0.32) |  | (0.09, 0.32) |  | (0.08, 0.31) |  |
|  | Age |  | < .01 |  | 0.01 |  | < .01 |  |
|  |  |  | (< - .01, 0.01) |  | (< - .01, 0.02) |  | (< - .01, 0.01) |  |
|  | White |  | 0.03 |  | 0.02 |  | 0.04 |  |
|  |  |  | (-0.10, 0.16) |  | (-0.11, 0.16) |  | (-0.10, 0.17) |  |
|  | Climate change concern |  | 0.27*** |  | 0.25*** |  | 0.25*** |  |
|  |  |  | (0.18, 0.36) |  | (0.15, 0.34) |  | (0.15, 0.34) |  |
|  | Political ideology |  | 0.42*** |  | 0.36*** |  | 0.34*** |  |
|  |  |  | (0.29, 0.54) |  | (0.22, 0.50) |  | (0.21, 0.48) |  |
|  | Heard vs. Not Heard |  |  |  | -0.08 |  | -0.08 |  |
|  |  |  |  |  | (-0.20, 0.04) |  | (-0.20, 0.04) |  |
|  | News leaning |  |  |  | 0.04 |  | 0.05 |  |
|  |  |  |  |  | (-0.01, 0.10) |  | (-0.01, 0.10) |  |
|  | News leaning X Heard |  |  |  |  |  | 0.06* |  |
|  |  |  |  |  |  |  | (0.01, 0.10) |  |
|  |  |  |  |  |  |  |  |  |
|  | Observations |  | 282 |  | 282 |  | 282 |  |
|  | *F* (df) |  | 36.53 (df = 6, 275)*** |  | 28.12 (df = 8, 273)*** |  | 26.14 (df = 9, 272)*** |  |
|  | Overall *R*2 |  | .44 |  | .45 |  | .46 |  |
|  | Change in *R*2 |  |  |  | .01 |  | .01* |  |

**p* < .05, ***p* < .01, *** *p* < .001

| Table 4.3.1. Negative Activist Traits Regressed onto Time of Survey and News Leaning with Covariates | | | | | | | |  |
| --- | --- | --- | --- | --- | --- | --- | --- | --- |
|  | predictor |  | Base Model (95% CI) |  | Main Effects (95% CI) |  | Interactions (95% CI) |  |
|  | (Intercept) |  | 1.49*** |  | 1.49*** |  | 1.49*** |  |
|  |  |  | (1.40, 1.57) |  | (1.40, 1.57) |  | (1.40, 1.57) |  |
|  | SES |  | 0.04 |  | 0.04 |  | 0.04 |  |
|  |  |  | (< - .01, 0.08) |  | (-0.01, 0.08) |  | (-0.01, 0.08) |  |
|  | Gender |  | 0.05 |  | 0.07 |  | 0.07 |  |
|  |  |  | (-0.02, 0.13) |  | (-0.01, 0.14) |  | (-0.01, 0.14) |  |
|  | Age |  | < -. 01 |  | < - .01 |  | < - .01 |  |
|  |  |  | (-0.01, < .01) |  | (-0.01, < .01) |  | (-0.01, < .01) |  |
|  | White |  | -0.02 |  | -0.03 |  | -0.02 |  |
|  |  |  | (-0.10, 0.07) |  | (-0.11, 0.06) |  | (-0.11, 0.06) |  |
|  | Climate change concern |  | 0.30*** |  | 0.29*** |  | 0.29*** |  |
|  |  |  | (0.24, 0.37) |  | (0.23, 0.36) |  | (0.23, 0.36) |  |
|  | Political ideology |  | 0.29*** |  | 0.24*** |  | 0.24*** |  |
|  |  |  | (0.21, 0.37) |  | (0.15, 0.33) |  | (0.15, 0.33) |  |
|  | Time of Survey |  |  |  | -0.07 |  | -0.07 |  |
|  |  |  |  |  | (-0.15, < .01) |  | (-0.15, < .01) |  |
|  | News leaning |  |  |  | 0.05** |  | 0.05* |  |
|  |  |  |  |  | (0.01, 0.08) |  | (0.01, 0.08) |  |
|  | News leaning X Time |  |  |  |  |  | -0.01 |  |
|  |  |  |  |  |  |  | (-0.04, 0.02) |  |
|  |  |  |  |  |  |  |  |  |
|  | Observations |  | 572 |  | 572 |  | 572 |  |
|  | *F* (df) |  | 55.65 (df = 6, 565)*** |  | 43.68 (df = 8, 563)*** |  | 38.83 (df = 9, 562)*** |  |
|  | Overall *R*2 |  | .37 |  | .38 |  | .38 |  |
|  | Change in *R*2 |  |  |  | .01** |  | < .01 |  |

**p* < .05, ***p* < .01, *** *p* < .001

| Table 4.3.2. Negative Activist Traits Regressed onto Heard vs. Not Heard and News Leaning with Covariates | | | | | | | |  |
| --- | --- | --- | --- | --- | --- | --- | --- | --- |
|  | predictor |  | Base Model (95% CI) |  | Main Effects (95% CI) |  | Interactions (95% CI) |  |
|  | (Intercept) |  | 1.49*** |  | 1.49*** |  | 1.49*** |  |
|  |  |  | (1.40, 1.57) |  | (1.40, 1.57) |  | (1.40, 1.57) |  |
|  | SES |  | 0.04 |  | 0.04 |  | 0.04 |  |
|  |  |  | (< - .01, 0.08) |  | (-0.01, 0.08) |  | (-0.01, 0.08) |  |
|  | Gender |  | 0.05 |  | 0.07 |  | 0.07 |  |
|  |  |  | (-0.02, 0.13) |  | (-0.01, 0.14) |  | (-0.01, 0.14) |  |
|  | Age |  | < -. 01 |  | < - .01 |  | < - .01 |  |
|  |  |  | (-0.01, < .01) |  | (-0.01, < .01) |  | (-0.01, < .01) |  |
|  | White |  | -0.02 |  | -0.03 |  | -0.02 |  |
|  |  |  | (-0.10, 0.07) |  | (-0.11, 0.06) |  | (-0.11, 0.06) |  |
|  | Climate change concern |  | 0.30*** |  | 0.29*** |  | 0.29*** |  |
|  |  |  | (0.24, 0.37) |  | (0.23, 0.36) |  | (0.23, 0.36) |  |
|  | Political ideology |  | 0.29*** |  | 0.24*** |  | 0.24*** |  |
|  |  |  | (0.21, 0.37) |  | (0.15, 0.33) |  | (0.15, 0.33) |  |
|  | Heard vs. Not Heard |  |  |  | -0.07 |  | -0.07 |  |
|  |  |  |  |  | (-0.15, < .01) |  | (-0.15, < .01) |  |
|  | News leaning |  |  |  | 0.05** |  | 0.05* |  |
|  |  |  |  |  | (0.01, 0.08) |  | (0.01, 0.08) |  |
|  | News leaning X Heard |  |  |  |  |  | -0.01 |  |
|  |  |  |  |  |  |  | (-0.04, 0.02) |  |
|  |  |  |  |  |  |  |  |  |
|  | Observations |  | 572 |  | 572 |  | 572 |  |
|  | *F* (df) |  | 55.65 (df = 6, 565)*** |  | 43.68 (df = 8, 563)*** |  | 38.83 (df = 9, 562)*** |  |
|  | Overall *R2* |  | .37 |  | .38 |  | .38 |  |
|  | Change in *R2* |  |  |  | .01** |  | < .01 |  |

**p* < .05, ***p* < .01, *** *p* < .001

| Table 4.4.1. Positive Masculine Traits Regressed onto Time of Survey and News Leaning with Covariates | | | | | | | |  |
| --- | --- | --- | --- | --- | --- | --- | --- | --- |
|  | predictor |  | Base Model (95% CI) |  | Main Effects (95% CI) |  | Interactions (95% CI) |  |
|  | (Intercept) |  | 2.23*** |  | 2.23*** |  | 2.23*** |  |
|  |  |  | (2.15, 2.31) |  | (2.15, 2.31) |  | (2.15, 2.31) |  |
|  | SES |  | < .01 |  | < .01 |  | < .01 |  |
|  |  |  | (-0.04, 0.04) |  | (-0.04, 0.04) |  | (-0.04, 0.04) |  |
|  | Gender |  | -0.14*** |  | -0.13*** |  | -0.13*** |  |
|  |  |  | (-0.21, -0.07) |  | (-0.20, -0.06) |  | (-0.20, -0.06) |  |
|  | Age |  | < - .01 |  | < - .01 |  | < - .01 |  |
|  |  |  | (-0.01, < .01) |  | (-0.01, < .01) |  | (-0.01, < .01) |  |
|  | White |  | -0.10* |  | -0.10* |  | -0.10* |  |
|  |  |  | (-0.18, -0.02) |  | (-0.18, -0.02) |  | (-0.18, -0.02) |  |
|  | Climate change concern |  | -0.22*** |  | -0.22*** |  | -0.23*** |  |
|  |  |  | (-0.28, -0.17) |  | (-0.29, -0.16) |  | (-0.29, -0.16) |  |
|  | Political ideology |  | -0.16*** |  | -0.16*** |  | -0.16*** |  |
|  |  |  | (-0.23, -0.08) |  | (-0.24, -0.08) |  | (-0.24, -0.08) |  |
|  | Time of Survey |  |  |  | -0.03 |  | -0.03 |  |
|  |  |  |  |  | (-0.1, 0.04) |  | (-0.1, 0.04) |  |
|  | News leaning |  |  |  | < .01 |  | < .01 |  |
|  |  |  |  |  | (-0.03, 0.04) |  | (-0.03, 0.04) |  |
|  | News leaning X Time |  |  |  |  |  | 0.01 |  |
|  |  |  |  |  |  |  | (-0.02, 0.04) |  |
|  |  |  |  |  |  |  |  |  |
|  | Observations |  | 572 |  | 572 |  | 572 |  |
|  | *F* (df) |  | 31.7 (df = 6, 565)*** |  | 23.82 (df = 8, 563)*** |  | 21.17 (df = 9, 562)*** |  |
|  | Overall *R*2 |  | .25 |  | .25 |  | .25 |  |
|  | Change in *R*2 |  |  |  | < .01 |  | < .01 |  |

**p* < .05, ***p* < .01, *** *p* < .001

| Table 4.4.2. Positive Masculine Traits Regressed onto Heard vs. Not Heard and News Leaning with Covariates | | | | | | | |  |
| --- | --- | --- | --- | --- | --- | --- | --- | --- |
|  | predictor |  | Base Model (95% CI) |  | Main Effects (95% CI) |  | Interactions (95% CI) |  |
|  | (Intercept) |  | 2.19*** |  | 2.19*** |  | 2.18*** |  |
|  |  |  | (2.08, 2.31) |  | (2.08, 2.31) |  | (2.07, 2.30) |  |
|  | SES |  | < .01 |  | < .01 |  | < .01 |  |
|  |  |  | (-0.06, 0.06) |  | (-0.06, 0.06) |  | (-0.06, 0.06) |  |
|  | Gender |  | -0.06 |  | -0.06 |  | -0.06 |  |
|  |  |  | (-0.16, 0.04) |  | (-0.16, 0.04) |  | (-0.16, 0.04) |  |
|  | Age |  | < .01 |  | < .01 |  | < .01 |  |
|  |  |  | (< - .01, 0.01) |  | (-0.01, 0.01) |  | (< - .01, 0.01) |  |
|  | White |  | -0.12* |  | -0.13* |  | -0.14* |  |
|  |  |  | (-0.23, < - .01) |  | (-0.25, -0.01) |  | (-0.25, -0.02) |  |
|  | Climate change concern |  | -0.21*** |  | -0.22*** |  | -0.22*** |  |
|  |  |  | (-0.30, -0.13) |  | (-0.3, -0.13) |  | (-0.3, -0.13) |  |
|  | Political ideology |  | -0.19** |  | -0.21** |  | -0.20** |  |
|  |  |  | (-0.30, -0.08) |  | (-0.33, -0.09) |  | (-0.32, -0.08) |  |
|  | Heard vs. Not Heard |  |  |  | 0.06 |  | 0.06 |  |
|  |  |  |  |  | (-0.04, 0.16) |  | (-0.04, 0.16) |  |
|  | News leaning |  |  |  | 0.02 |  | 0.02 |  |
|  |  |  |  |  | (-0.02, 0.07) |  | (-0.03, 0.07) |  |
|  | News leaning X Heard |  |  |  |  |  | -0.02 |  |
|  |  |  |  |  |  |  | (-0.06, 0.02) |  |
|  |  |  |  |  |  |  |  |  |
|  | Observations |  | 282 |  | 282 |  | 282 |  |
|  | *F* (df) |  | 18.48 (df = 6, 275)*** |  | 14.13 (df = 8, 273)*** |  | 12.69 (df = 9, 272)*** |  |
|  | Overall *R*2 |  | .29 |  | .29 |  | .30 |  |
|  | Change in *R*2 |  |  |  | .01 |  | < .01 |  |

**p* < .05, ***p* < .01, *** *p* < .001

| Table 4.5.1. Positive Feminine Traits Regressed onto Time of Survey and News Leaning with Covariates | | | | | | | |  |
| --- | --- | --- | --- | --- | --- | --- | --- | --- |
|  | predictor |  | Base Model (95% CI) |  | Main Effects (95% CI) |  | Interactions (95% CI) |  |
|  | (Intercept) |  | 1.97*** |  | 1.97*** |  | 1.97*** |  |
|  |  |  | (1.89, 2.05) |  | (1.89, 2.05) |  | (1.89, 2.05) |  |
|  | SES |  | 0.01 |  | 0.01 |  | 0.01 |  |
|  |  |  | (-0.03, 0.05) |  | (-0.03, 0.05) |  | (-0.03, 0.05) |  |
|  | Gender |  | -0.08* |  | -0.08* |  | -0.08* |  |
|  |  |  | (-0.15, -0.01) |  | (-0.15, -0.01) |  | (-0.15, -0.01) |  |
|  | Age |  | < .01 |  | < .01 |  | < .01 |  |
|  |  |  | (< - .01, 0.01) |  | (< - .01, 0.01) |  | (< - .01, 0.01) |  |
|  | White |  | -0.06 |  | -0.05 |  | -0.06 |  |
|  |  |  | (-0.14, 0.03) |  | (-0.13, 0.03) |  | (-0.14, 0.03) |  |
|  | Climate change concern |  | -0.23*** |  | -0.23*** |  | -0.23*** |  |
|  |  |  | (-0.29, -0.17) |  | (-0.29, -0.17) |  | (-0.29, -0.17) |  |
|  | Political ideology |  | -0.22*** |  | -0.21*** |  | -0.21*** |  |
|  |  |  | (-0.29, -0.14) |  | (-0.29, -0.13) |  | (-0.29, -0.13) |  |
|  | Time of Survey |  |  |  | -0.02 |  | -0.01 |  |
|  |  |  |  |  | (-0.08, 0.06) |  | (-0.08, 0.06) |  |
|  | News leaning |  |  |  | -0.01 |  | -0.01 |  |
|  |  |  |  |  | (-0.04, 0.03) |  | (-0.04, 0.03) |  |
|  | News leaning X Time |  |  |  |  |  | 0.02 |  |
|  |  |  |  |  |  |  | (< - .01, 0.05) |  |
|  |  |  |  |  |  |  |  |  |
|  | Observations |  | 572 |  | 572 |  | 572 |  |
|  | *F* (df) |  | 37.26 (df = 6, 565)*** |  | 27.92 (df = 8, 563)*** |  | 25.25 (df = 9, 562)*** |  |
|  | Overall *R*2 |  | .28 |  | .28 |  | .29 |  |
|  | Change in *R*2 |  |  |  | < .01 |  | < .01 |  |

**p* < .05, ***p* < .01, *** *p* < .001

| Table 4.5.2. Positive Feminine Traits Regressed onto Heard vs. Not Heard and News Leaning with Covariates | | | | | | | |  |
| --- | --- | --- | --- | --- | --- | --- | --- | --- |
|  | predictor |  | Base Model (95% CI) |  | Main Effects (95% CI) |  | Interactions (95% CI) |  |
|  | (Intercept) |  | 1.93*** |  | 1.93*** |  | 1.93*** |  |
|  |  |  | (1.81, 2.04) |  | (1.81, 2.05) |  | (1.81, 2.05) |  |
|  | SES |  | 0.02 |  | 0.02 |  | 0.02 |  |
|  |  |  | (-0.04, 0.08) |  | (-0.04, 0.08) |  | (-0.04, 0.08) |  |
|  | Gender |  | -0.03 |  | -0.03 |  | -0.03 |  |
|  |  |  | (-0.13, 0.07) |  | (-0.13, 0.07) |  | (-0.13, 0.07) |  |
|  | Age |  | < .01 |  | < .01 |  | < .01 |  |
|  |  |  | (< - .01, 0.01) |  | (< - .01, 0.01) |  | (< - .01, 0.01) |  |
|  | White |  | -0.02 |  | -0.02 |  | -0.02 |  |
|  |  |  | (-0.13, 0.1) |  | (-0.14, 0.09) |  | (-0.14, 0.1) |  |
|  | Climate change concern |  | -0.22*** |  | -0.22*** |  | -0.22*** |  |
|  |  |  | (-0.30, -0.14) |  | (-0.31, -0.14) |  | (-0.31, -0.14) |  |
|  | Political ideology |  | -0.23*** |  | -0.26*** |  | -0.26*** |  |
|  |  |  | (-0.34, -0.12) |  | (-0.38, -0.14) |  | (-0.38, -0.14) |  |
|  | Heard vs. Not Heard |  |  |  | < .01 |  | < .01 |  |
|  |  |  |  |  | (-0.10, 0.11) |  | (-0.10, 0.11) |  |
|  | News leaning |  |  |  | 0.02 |  | 0.02 |  |
|  |  |  |  |  | (-0.02, 0.07) |  | (-0.02, 0.08) |  |
|  | News leaning X Heard |  |  |  |  |  | < .01 |  |
|  |  |  |  |  |  |  | (-0.04, 0.04) |  |
|  |  |  |  |  |  |  |  |  |
|  | Observations |  | 282 |  | 282 |  | 282 |  |
|  | *F* (df) |  | 19.93 (df = 6, 275)*** |  | 15.01 (df = 8, 273)*** |  | 13.3 (df = 9, 272)*** |  |
|  | Overall *R*2 |  | .30 |  | .31 |  | .31 |  |
|  | Change in *R*2 |  |  |  | < .01 |  | < .01 |  |

**p* < .05, ***p* < .01, *** *p* < .001

| Table 5.1.1. Collective Action Intentions Regressed onto Time of Survey and News Leaning with Covariates | | | | | | | |  |
| --- | --- | --- | --- | --- | --- | --- | --- | --- |
|  | predictor |  | Base Model (95% CI) |  | Main Effects (95% CI) |  | Interactions (95% CI) |  |
|  | (Intercept) |  | -0.24*** |  | -0.24*** |  | -0.24*** |  |
|  |  |  | (-0.32, -0.16) |  | (-0.32, -0.16) |  | (-0.32, -0.16) |  |
|  | SES |  | 0.07** |  | 0.07** |  | 0.07** |  |
|  |  |  | (0.03, 0.11) |  | (0.03, 0.11) |  | (0.03, 0.11) |  |
|  | Gender |  | -0.05 |  | -0.05 |  | -0.05 |  |
|  |  |  | (-0.12, 0.02) |  | (-0.12, 0.02) |  | (-0.12, 0.02) |  |
|  | Age |  | < .01 |  | < .01 |  | < .01 |  |
|  |  |  | (-0.01, < .01) |  | (-0.01, < .01) |  | (-0.01, < .01) |  |
|  | White |  | -0.05 |  | -0.05 |  | -0.05 |  |
|  |  |  | (-0.13, 0.04) |  | (-0.13, 0.03) |  | (-0.13, 0.03) |  |
|  | Climate change concern |  | -0.37*** |  | -0.37*** |  | -0.38*** |  |
|  |  |  | (-0.43, -0.31) |  | (-0.43, -0.31) |  | (-0.44, -0.31) |  |
|  | Political ideology |  | -0.19*** |  | -0.19*** |  | -0.19*** |  |
|  |  |  | (-0.26, -0.11) |  | (-0.27, -0.11) |  | (-0.28, -0.11) |  |
|  | Time of Survey |  |  |  | < .01 |  | < .01 |  |
|  |  |  |  |  | (-0.07, 0.07) |  | (-0.07, 0.07) |  |
|  | News leaning |  |  |  | 0.01 |  | 0.01 |  |
|  |  |  |  |  | (-0.03, 0.04) |  | (-0.03, 0.04) |  |
|  | News leaning X Time |  |  |  |  |  | 0.03* |  |
|  |  |  |  |  |  |  | (< .01, 0.06) |  |
|  |  |  |  |  |  |  |  |  |
|  | Observations |  | 572 |  | 572 |  | 572 |  |
|  | *F* (df) |  | 62.19 (df = 6, 565)*** |  | 46.5 (df = 8, 563)*** |  | 42.19 (df = 9, 562)*** |  |
|  | Overall *R*2 |  | .40 |  | .40 |  | .40 |  |
|  | Change in *R*2 |  |  |  | < .01 |  | .01* |  |

**p* < .05, ***p* < .01, *** *p* < .001

| Table 5.1.2. Collective Action Intentions Regressed onto Heard vs. Not Heard and News Leaning with Covariates | | | | | | | |  |
| --- | --- | --- | --- | --- | --- | --- | --- | --- |
|  | predictor |  | Base Model (95% CI) |  | Main Effects (95% CI) |  | Interactions (95% CI) |  |
|  | (Intercept) |  | -0.22*** |  | -0.22*** |  | -0.22*** |  |
|  |  |  | (-0.33, -0.11) |  | (-0.33, -0.10) |  | (-0.34, -0.11) |  |
|  | SES |  | 0.14*** |  | 0.14*** |  | 0.14*** |  |
|  |  |  | (0.09, 0.20) |  | (0.08, 0.20) |  | (0.09, 0.20) |  |
|  | Gender |  | -0.05 |  | -0.06 |  | -0.05 |  |
|  |  |  | (-0.15, 0.04) |  | (-0.15, 0.04) |  | (-0.15, 0.05) |  |
|  | Age |  | < - .01 |  | < - .01 |  | < - .01 |  |
|  |  |  | (-0.01, < .01) |  | (-0.01, < .01) |  | (-0.01, < .01) |  |
|  | White |  | -0.07 |  | -0.09 |  | -0.09 |  |
|  |  |  | (-0.18, 0.04) |  | (-0.20, 0.03) |  | (-0.20, 0.02) |  |
|  | Climate change concern |  | -0.36*** |  | -0.37*** |  | -0.37*** |  |
|  |  |  | (-0.44, -0.29) |  | (-0.45, -0.29) |  | (-0.45, -0.29) |  |
|  | Political ideology |  | -0.15** |  | -0.18** |  | -0.18** |  |
|  |  |  | (-0.25, -0.04) |  | (-0.3, -0.06) |  | (-0.29, -0.06) |  |
|  | Heard vs. Not Heard |  |  |  | 0.06 |  | 0.06 |  |
|  |  |  |  |  | (-0.04, 0.16) |  | (-0.04, 0.16) |  |
|  | News leaning |  |  |  | 0.04 |  | 0.04 |  |
|  |  |  |  |  | (-0.01, 0.09) |  | (-0.01, 0.08) |  |
|  | News leaning X Heard |  |  |  |  |  | -0.02 |  |
|  |  |  |  |  |  |  | (-0.06, 0.02) |  |
|  |  |  |  |  |  |  |  |  |
|  | Observations |  | 282 |  | 282 |  | 282 |  |
|  | *F* (df) |  | 37.9 (df = 6, 275)*** |  | 29 (df = 8, 273)*** |  | 25.89 (df = 9, 272)*** |  |
|  | Overall *R*2 |  | .45 |  | .46 |  | .46 |  |
|  | Change in *R*2 |  |  |  | .01 |  | < .01 |  |

**p* < .05, ***p* < .01, *** *p* < .001

References

Budak, C., Goel, S., & Rao, J. M. (2016). Fair and Balanced? Quantifying Media Bias through Crowdsourced Content Analysis. *Public Opinion Quarterly*, *80*(S1), 250–271. https://doi.org/10.1093/poq/nfw007

Otero, V. (2018). Media Bias Chart. Retrieved July 26, 2018, from http://www.allgeneralizationsarefalse.com/
